# Supplementary material for: Factors leading to effective social participation promotion interventions for people with intellectual disability: a protocol for a systematic review
Source: Springer Nature journal article supplement (doi:10.1186/s13643-021-01716-3), 2021-06-04
Supplement: MOESM2 [file 19230608]

## Additional file 2

### Literature search strategy for systematic review of factors leading to effective social participation promotion interventions for people with intellectual disability

#### Database 1 (Web of Science) search strategy

(  
TS=(intellectual disabilit\* OR learning disabilit\* OR mental retardation OR developmental disabilit\* OR neurodevelopmental disorder\* OR developmental disorder\* OR autism OR down syndrome OR trastorno\* del neurodesarrollo OR trastorno\* del desarrollo OR discapacidad intelectual OR discapacidad de aprendizaje OR retardo mental OR retraso mental OR autismo OR síndrome de down)  
AND  
TS=(social participation OR political participation OR community participation OR advocacy OR empowerment OR self-determination OR participación social OR autodeterminación OR vocería OR empoderamiento)  
AND  
TS=(intervention OR workshop OR course OR program\* OR intervención OR taller OR curso)  
) OR (  
TI=(intellectual disabilit\* OR learning disabilit\* OR mental retardation OR developmental disabilit\* OR neurodevelopmental disorder\* OR developmental disorder\* OR autism OR down syndrome OR trastorno\* del neurodesarrollo OR trastorno\* del desarrollo OR discapacidad intelectual OR discapacidad de aprendizaje OR retardo mental OR retraso mental OR autismo OR síndrome de down)  
AND  
TI=(social participation OR political participation OR community participation OR advocacy OR empowerment OR self-determination OR participación social OR autodeterminación OR vocería OR empoderamiento)  
AND  
TI=(intervention OR workshop OR course OR program\* OR intervención OR taller OR curso)  
)
